# Supplementary material
Source: publisher figshare collection journal article supplement (https://acs.figshare.com/ndownloader/files/4625116)

## Supporting Information

### Hydroxyapatite Supported Palladium (PdHAP) Catalyzed Efficient Synthesis of (*E*)-2-Alkene-4-yn Carboxylic Esters. Intense Fluorescence Emission of Selected Compounds

Brindaban C. Ranu,\* Laksmikanta Adak, and Kalicharan Chattopadhyay

| Table of Contents                                                                                                                      | Page no. |
|----------------------------------------------------------------------------------------------------------------------------------------|----------|
| Experimental Procedure for the Preparation of<br>Peptide, Fluorescent measurement parameters,<br>TEM image of the fresh and used PdHAP | S2-S3    |
| Characterization Data of Products in<br>Entries 2,4,6,7,8,9,11,14,and 15, Table 3                                                      | S4- S6   |
| <sup>1</sup> H NMR and <sup>13</sup> C NMR spectra of all<br>Products listed in Table 3                                                | S7-S23   |

## Experimental procedure for peptide synthesis

### Synthesis of (*E*)-5-naphthalen-1-yl-pent-2-en-4-ynoic acid (**2**)

(a) A solution of 5-naphthalen-1-yl-pent-2-en-4-ynoic acid butyl ester **I** (278 mg, 1 mmol) in THF (4.0 mL) and aqueous LiOH solution (1.0 M, 3 mL, 3 mmol) was stirred at room temperature for 18 h. After evaporation of THF the residue was diluted with water (3 mL) and extracted with EtOAc. The aqueous phase was cooled to 0 °C, acidified with cold 10% H<sub>2</sub>SO<sub>4</sub> and extracted with EtOAc. The combined organic extract was dried over Na<sub>2</sub>SO<sub>4</sub> and concentrated under reduced pressure to give compound **2** (182 mg, 82%).

### (b) Synthesis of methyl ester protected tryptophan hydrochloride

A slurry of tryptophan (2.04 g, 10 mmol) in methanol (10 mL) was added in portions to a cooled (0-5°C) solution of SOCl<sub>2</sub> (1 mL) in MeOH (10 mL) and the mixture was sonicated in an ultrasound bath to make a clear solution. It was then stirred at room temperature 10 h. The reaction mixture was concentrated and extracted with ether (3x15 mL). Then ether extract was evaporated to leave a solid product which was dried in vacuum to give the corresponding methyl ester.

### (c) Synthesis of peptide (**3**)

The HCL-free tryptophan methyl ester in ethyl acetate (5 mL) was added to a cooled solution of compound **2** (5 mmol, 1.11 g) in DMF (2.5 mL) and *N*-hydroxybenzotriazole (HOBT) (675 ml, 5 mmol) and the reaction mixture was stirred for five min followed by addition of DCC (1.03 g, 5 mmol). The whole solution was stirred for 48 h and extracted with ethyl acetate (20 mL). The extract was filtered through sintered funnel and the residue was washed with EtOAc. The combined organic extract was then washed with 2N HCl, brine, satd. Na<sub>2</sub>CO<sub>3</sub> solution, brine, and dried over Na<sub>2</sub>SO<sub>4</sub>. Solvent was evaporated

to leave the crude product which was purified by column chromatography using ethyl acetate and pet-ether as eluent (40:60) to afford the pure peptide (3).

**(d) Fluorescence measurement parameters**

The steady state absorption and emission spectra were recorded in a Shimadzu UV-2401 spectrophotometer and a spex fluoromax-3 spectrofluorimeter, respectively. All absorbance and fluorescence experiments were carried out in 1 cm quartz cells, using freshly prepared solutions, thermostatted at 25 °C. Quantum yields were determined using a fluorescent dye (coumarin 480, C480) in cyclohexane as the reference compound with a reported quantum yield of 1.05. For all the compounds (fig. 1 and 2) the excitation wave length used was 300 nm.

TEM images of nonstoichiometric Pd-HAP before (Fig. a) and after (Fig. b) reaction, taken on a JEM-2011 (JEOL) microscope

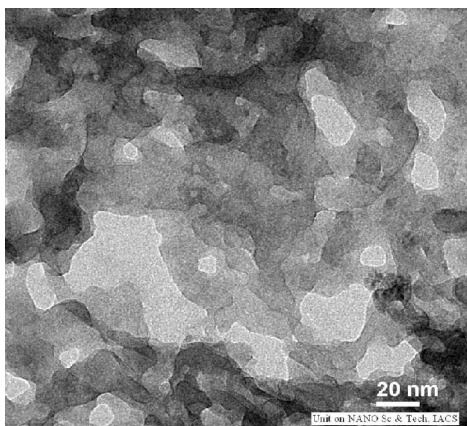

Figure a

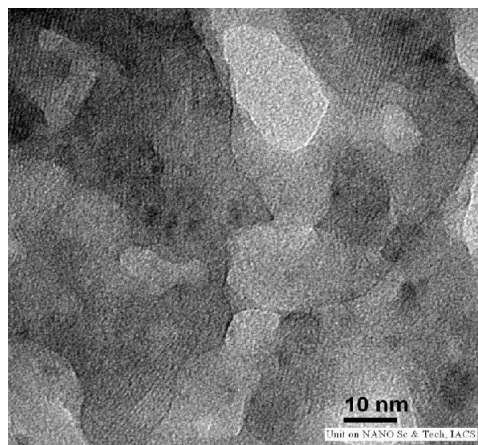

Figure b

**Characterization Data of the Unknown Compounds in entries 2,4,6,7,8,9,11,14 and 15 in Table 3**

**5-Phenyl-pent-2-en-4-ynoic acid tert-butyl ester [entry 2, Table 3].** Light yellow liquid: IR (neat): 2906, 2868, 2195, 1716, 1620, 1309, 1253, 1176, 1028  $\text{cm}^{-1}$ ;  $^1\text{H}$  NMR (300 MHz,  $\text{CDCl}_3$ )  $\delta$  1.50 (s, 9H), 6.25 (d,  $J = 15.8$  Hz, 1H), 6.89 (d,  $J = 15.8$  Hz, 1H), 7.30-7.36 (m, 3H), 7.46-7.52 (m, 2H);  $^{13}\text{C}$  NMR (75 MHz,  $\text{CDCl}_3$ )  $\delta$  28.2 (3C), 81.1, 86.6, 97.7, 122.5, 124.1, 128.5 (2C), 129.3, 132.0 (2C), 132.2, 165.3; HRMS Calcd for  $\text{C}_{15}\text{H}_{16}\text{O}_2$   $[\text{M}+\text{Na}]^+$ : 251.1048; Found: 251.1056.

**5-*p*-Tolyl-pent-2-en-4-ynoic acid butyl ester [entry 4, Table 3].** Yellowish liquid; IR (neat): 2960, 2933, 2200, 1714, 1620, 1489, 1311, 1251, 1173, 1092, 1024, 827  $\text{cm}^{-1}$ ;  $^1\text{H}$  NMR  $\delta$  0.97 (t,  $J = 7.3$  Hz, 3H), 1.38-1.46 (m, 2H), 1.63-1.72 (m, 2H), 2.38 (s, 3H), 4.19 (t,  $J = 6.6$  Hz, 2H), 6.30 (d,  $J = 15.8$  Hz, 1H), 6.99 (d,  $J = 15.8$  Hz, 1H), 7.17 (d,  $J = 7.8$  Hz, 2H), 7.39 (d,  $J = 7.8$  Hz, 2H);  $^{13}\text{C}$  NMR  $\delta$  13.8, 19.2, 21.7, 30.8, 64.7, 86.0, 98.8, 119.3, 125.4, 129.4 (2C), 129.7, 132.0 (2C), 139.8, 166.2; HRMS Calcd for  $\text{C}_{16}\text{H}_{18}\text{O}_2$   $[\text{M}+\text{Na}]^+$ : 265.1307; Found : 265.1311.

**5-(4-Chloro-phenyl)-pent-2-en-4-ynoic acid butyl ester [entry 6, Table 3].** Yellow liquid: IR (neat): 2963, 2880, 2197, 1716, 1621, 1395, 1270, 1180, 1020  $\text{cm}^{-1}$ ;  $^1\text{H}$  NMR  $\delta$  0.95 (t,  $J = 7.3$  Hz, 3H), 1.34-1.47 (m, 2H), 1.61-1.71 (m, 2H), 4.18 (t,  $J = 6.6$  Hz, 2H), 6.31 (d,  $J = 15.8$  Hz, 1H), 6.95 (d,  $J = 15.8$  Hz, 1H), 7.31 (d,  $J = 8.5$  Hz, 2H), 7.36 (d,  $J = 8.5$  Hz, 2H);  $^{13}\text{C}$  NMR  $\delta$  13.8, 19.3, 30.8, 64.8, 87.4, 97.0, 120.8, 124.8, 129.0 (2C), 130.6, 133.3 (2C), 135.6, 166.0; HRMS Calcd for  $\text{C}_{15}\text{H}_{15}\text{ClO}_2$   $[\text{M}+\text{Na}]^+$ : 285.0625; Found: 285.0648.

**5-(2-Bromo-phenyl)-pent-2-en-4-ynoic acid butyl ester [entry 7, Table 3].** Yellow liquid: IR (neat): 2958, 2931, 2202, 1715, 1618, 1467, 1315, 1259, 1174, 1026  $\text{cm}^{-1}$ ;  $^1\text{H}$  NMR  $\delta$  0.87 (t,  $J = 7.4$  Hz, 3H), 1.29-1.37 (m, 2H), 1.54-1.63 (m, 2H), 4.11 (t,  $J = 6.6$  Hz, 2H), 6.30 (d,  $J = 15.8$  Hz, 1H), 6.92 (d,  $J = 15.8$  Hz, 1H), 7.12-7.21 (m, 2H), 7.41

(dd,  $J = 8.2$  Hz, 1.5 Hz, 1H), 7.51 (d,  $J = 8.2$  Hz, 1H);  $^{13}\text{C}$  NMR  $\delta$  13.8, 19.2, 30.8, 64.8, 90.6, 96.3, 124.5, 124.6, 125.9, 127.2, 130.5, 131.0, 132.7, 133.8, 165.9; HRMS Calcd for  $\text{C}_{15}\text{H}_{15}\text{BrO}_2$   $[\text{M}+\text{Na}]^+$ : 329.0153, 331.0134; Found: 329.0151, 331.0147.

**5-(2-Bromo-phenyl)-pent-2-en-ynoic acid butyl ester [entry 8, Table 3].** Yellow liquid: IR (neat): 2978, 2931, 2203, 1708, 1616, 1469, 1323, 1151, 958, 754  $\text{cm}^{-1}$ ;  $^1\text{H}$  NMR  $\delta$  1.51 (s, 9H), 6.32 (d,  $J = 15.8$  Hz, 1H), 6.91 (d,  $J = 15.8$  Hz, 1H), 7.19-7.28 (m, 2H), 7.48 (dd,  $J = 7.7$  Hz, 1.4 Hz, 1H), 7.59 (d,  $J = 7.9$  Hz, 1H);  $^{13}\text{C}$  NMR  $\delta$  28.2 (3C), 81.3, 90.7, 95.7, 123.6, 124.7, 125.9, 127.2, 130.3, 132.6, 132.7, 133.7, 165.1; HRMS Calcd for  $\text{C}_{15}\text{H}_{15}\text{BrO}_2$   $[\text{M}+\text{Na}]^+$ : 329.0153, 331.0134; Found: 329.0155, 331.0150.

**5-(4-Fluoro-phenyl)-pent-2-en-4-ynoic acid butyl ester [entry 9, Table 3].** Yellowish liquid: IR (neat): 2960, 2935, 2874, 2202, 1715, 1620, 1597, 1506, 1313, 1232, 1155, 1024, 837  $\text{cm}^{-1}$ ;  $^1\text{H}$  NMR  $\delta$  0.95 (t,  $J = 7.3$  Hz, 3H), 1.34-1.47 (m, 2H), 1.61-1.71 (m, 2H), 4.15 (t,  $J = 6.6$  Hz, 2H), 6.29 (d,  $J = 15.8$  Hz, 1H), 6.95 (d,  $J = 15.8$  Hz, 1H), 7.04 (t,  $J = 8.6$  Hz, 2H), 7.44-7.48 (m, 2H);  $^{13}\text{C}$  NMR  $\delta$  13.8, 19.3, 30.8, 64.8, 86.2, 97.2, 115.8, 116.1, 118.5, 124.9, 130.3, 134.0, 134.2, 161.5, 164.9, 166.1; HRMS Calcd for  $\text{C}_{15}\text{H}_{15}\text{FO}_2$   $[\text{M}+\text{Na}]^+$ : 269.0954, Found: 269.0947.

**5-(3-Methoxy-phenyl)-pent-2-en-4-ynoic acid butyl ester [entry 11, Table 3].** Yellow liquid: IR (neat): 2965, 2929, 2200, 1716, 1460, 1325, 1251, 1020, 920  $\text{cm}^{-1}$ ;  $^1\text{H}$  NMR  $\delta$  0.87 (t,  $J = 7.3$  Hz, 3H), 1.29-1.37 (m, 2H), 1.53-1.63 (m, 2H), 3.72 (s, 3H), 4.10 (t,  $J = 6.6$  Hz, 2H), 6.23 (d,  $J = 15.9$  Hz, 1H), 6.85 (d,  $J = 7.5$  Hz, 1H), 6.89 (d,  $J = 15.9$  Hz, 1H), 6.92 (s, 1H), 6.99 (d,  $J = 7.6$  Hz, 1H), 7.17 (t,  $J = 7.7$  Hz, 1H);  $^{13}\text{C}$  NMR  $\delta$  13.8, 19.2, 30.7, 55.4, 64.8, 86.2, 98.2, 116.0, 116.7, 123.2, 124.6, 125.0, 129.6, 130.2, 159.5, 166.1; HRMS Calcd for  $\text{C}_{16}\text{H}_{18}\text{O}_3$   $[\text{M}+\text{Na}]^+$ : 281.1154; Found : 281.1151.

**Non-2-en-4-ynoic acid butyl ester [entry 14, Table 3].** Colorless liquid: IR (neat): 2959, 2933, 2873, 2214, 1716, 1620, 1466, 1299, 1157, 962  $\text{cm}^{-1}$ ;  $^1\text{H}$  NMR  $\delta$  0.89-0.95 (m, 6H), 1.35-1.65 (m, 8H), 2.34-2.39 (m, 2H) 4.16 (t,  $J = 6.5$  Hz, 2H), 6.14 (d,  $J = 15.8$  Hz, 1H), 6.74 (dt,  $J = 15.8$  Hz, 2.2 Hz, 1H);  $^{13}\text{C}$  NMR  $\delta$  13.7, 13.8, 19.3, 19.6, 22.1, 30.5, 30.8, 64.6, 78.1, 100.9, 126.2, 129.4, 166.4; HRMS Calcd for  $\text{C}_{13}\text{H}_{20}\text{O}_2$   $[\text{M}+\text{Na}]^+$ : 231.1361; Found: 231.1362.

**Undec-2-en-4-ynoic acid methyl ester [entry 15, Table 3].** Colorless liquid; IR (neat): 2958, 2931, 2872, 2214, 1716, 1620, 1465, 1299, 1286, 1176, 1157, 962  $\text{cm}^{-1}$ ;  $^1\text{H}$  NMR  $\delta$  0.89 (t,  $J$  = 6.4 Hz, 3H), 1.25-1.43 (m, 6H), 1.50-1.62 (m, 2H), 2.36 (td,  $J$  = 6.9 Hz, 2.0 Hz, 2H), 3.76 (s, 3H), 6.14 (d,  $J$  = 15.8 Hz, 1H), 6.76 (dt,  $J$  = 15.8 Hz, 2.1 Hz, 1H);  $^{13}\text{C}$  NMR  $\delta$  14.17, 19.9, 22.6, 28.4, 28.7, 31.4, 51.9, 78.1, 101.3, 126.6, 128.9, 166.8; HRMS Calcd for  $\text{C}_{12}\text{H}_{18}\text{O}_2$   $[\text{M}+\text{Na}]^+$ : 217.1305; Found: 217.1309.

**3-(1H-Indol-3-yl)-2-(5-naphthalen-1-yl-pent-2-en-4-ynoylamino)-propionic acid methyl ester [Scheme 2, Compound 3].** Brownish viscous liquid; IR (neat): 3400, 3300, 3058, 2949, 2932, 2854, 2246, 2191, 1738, 1651, 1614, 1537, 1519, 1437, 1340, 1272, 1207, 1180, 908, 734  $\text{cm}^{-1}$ ;  $^1\text{H}$  NMR  $\delta$  3.40 (t,  $J$  = 8.4 Hz, 2H), 3.69 (s, 3H), 5.06-5.12 (m, 1H), 6.42 (d,  $J$  = 15.5 Hz, 1H), 6.51 (d,  $J$  = 7.8 Hz, 1H), 6.98 (d,  $J$  = 1.8 Hz, 1H), 7.13 (d,  $J$  = 15.5 Hz, 1H), 7.12-7.20 (m, 2H), 7.34-7.44 (m, 2H), 7.52-7.58 (m, 3H), 7.68 (d,  $J$  = 6.9 Hz, 1H), 7.85 (d,  $J$  = 8.2 Hz, 1H), 8.28 (d,  $J$  = 8.1 Hz, 1H), 8.65 (s, 1H);  $^{13}\text{C}$  NMR  $\delta$  27.6, 52.5, 53.4, 91.6, 95.3, 109.6, 111.5, 118.5, 119.7, 119.9, 122.2, 122.3, 123.1, 125.2, 125.9, 126.6, 127.1, 127.6, 128.4, 129.8, 131.2, 131.9, 133.1, 133.2, 136.2, 164.5, 172.3; HRMS Calcd for  $\text{C}_{27}\text{H}_{22}\text{N}_2\text{O}_3$   $[\text{M}+\text{Na}]^+$ : 445.1528; Found: 445.1529.

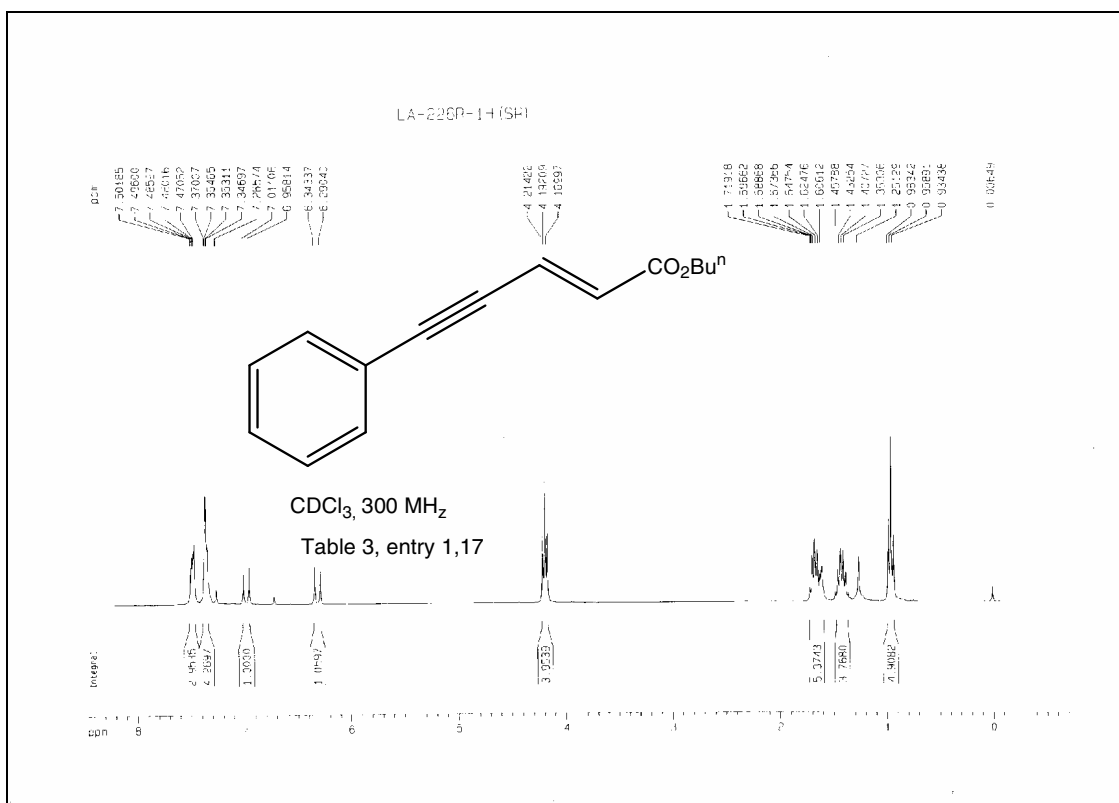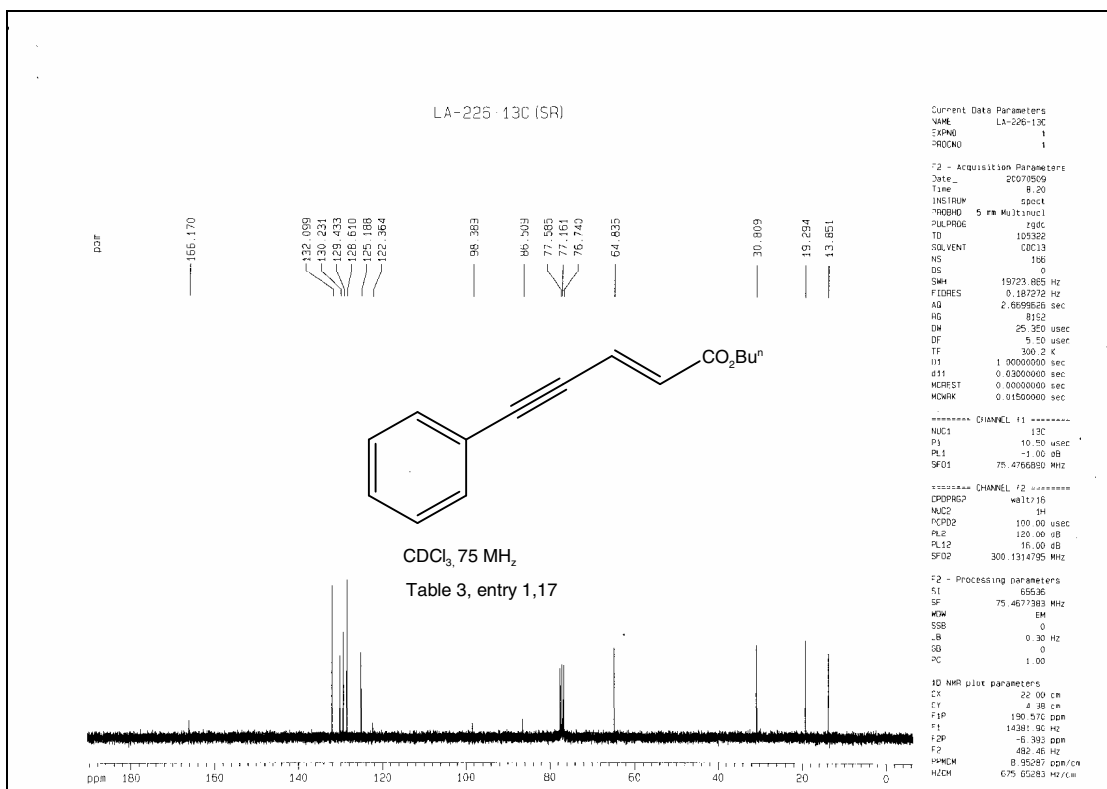

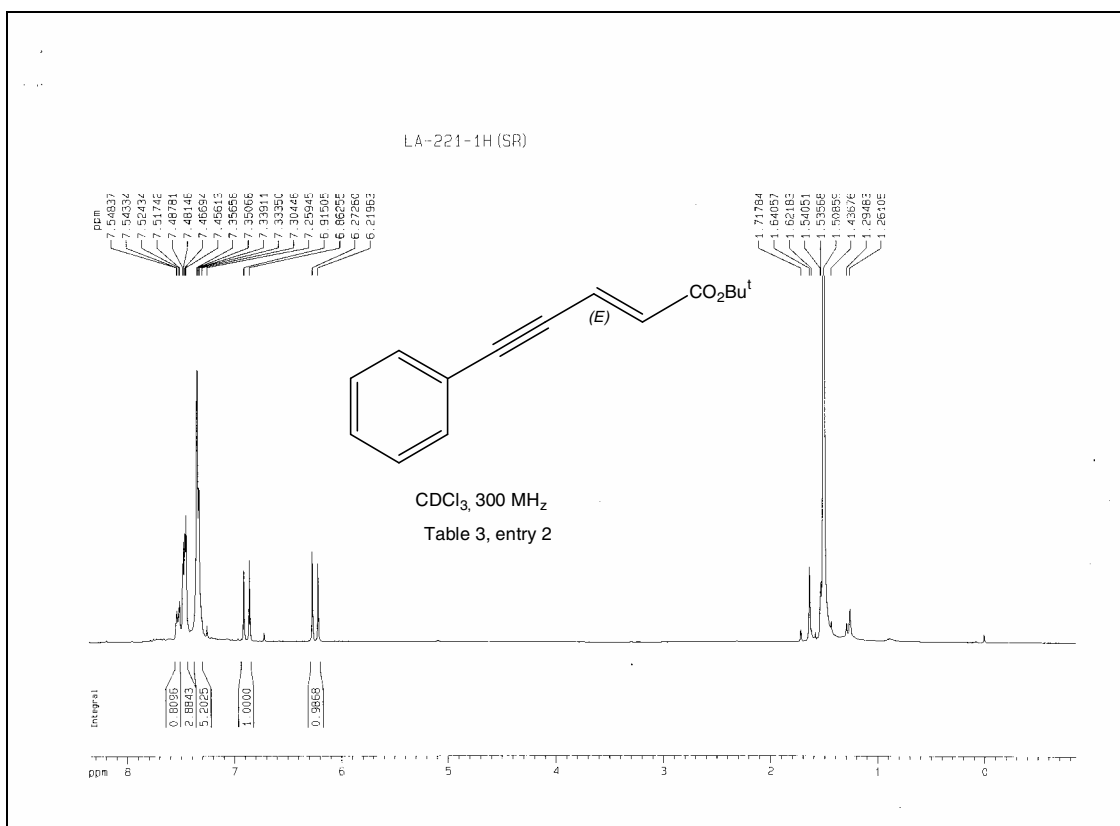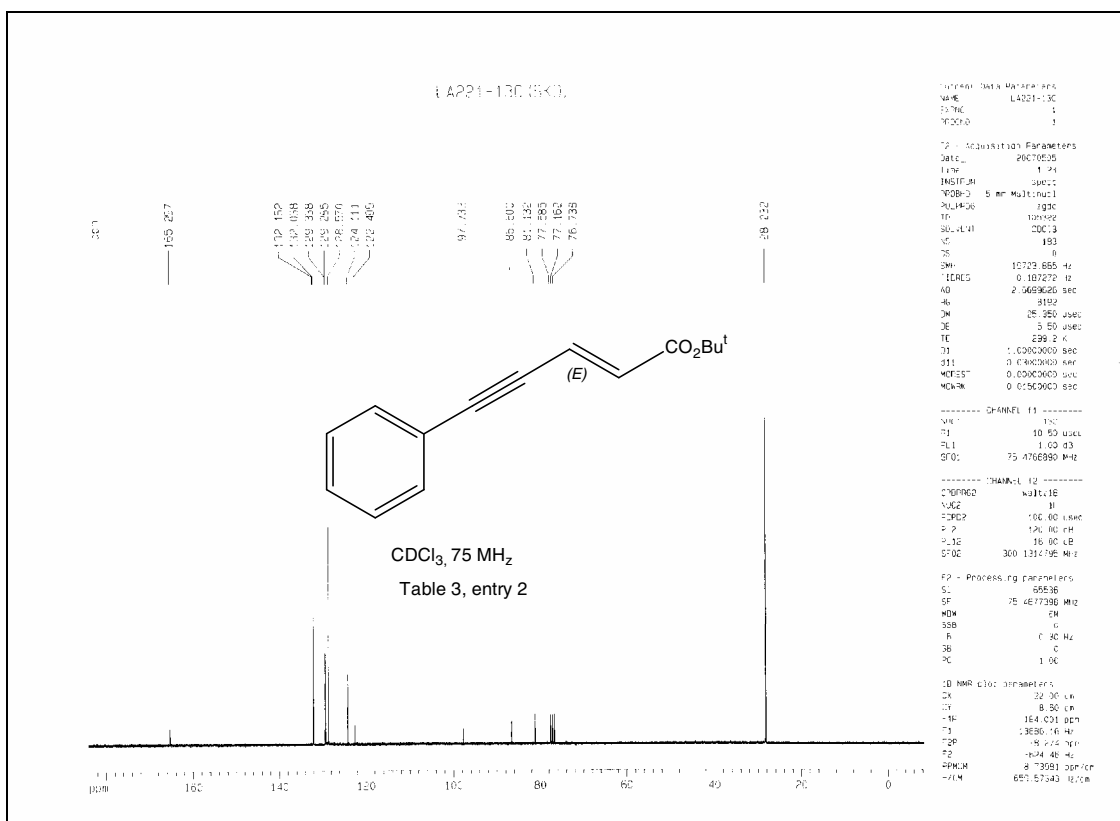



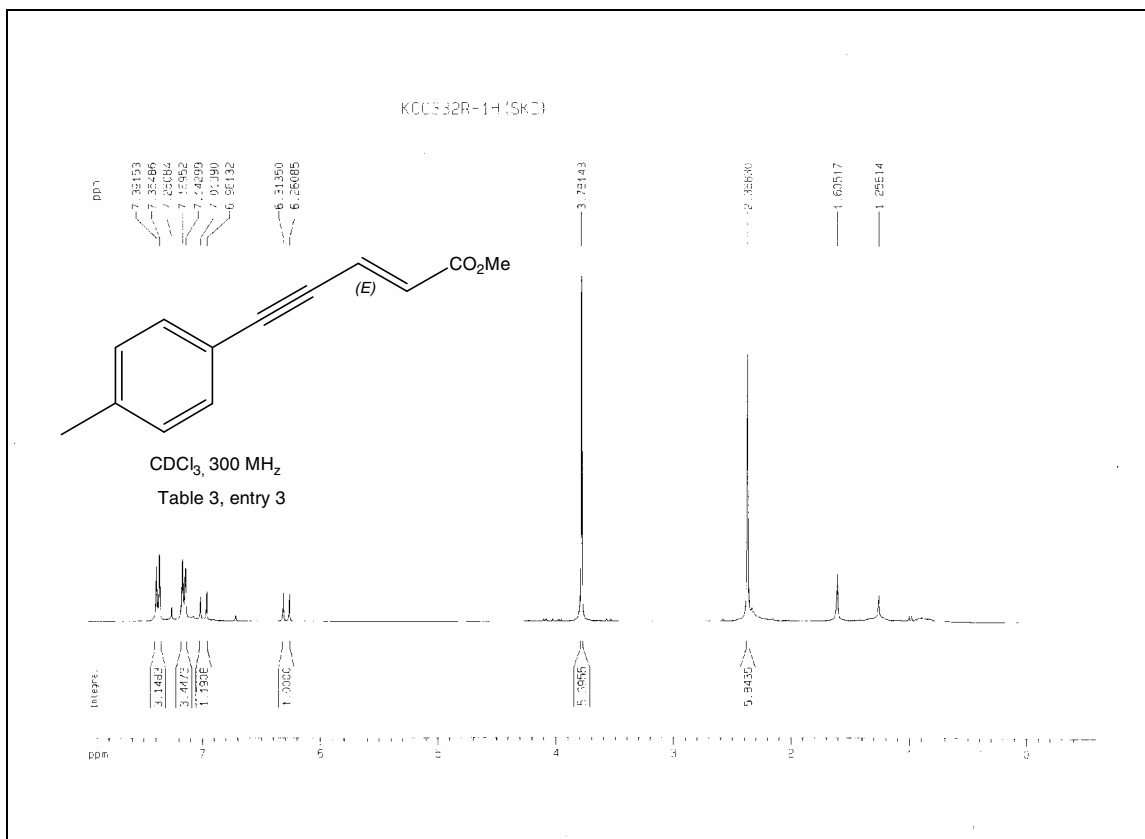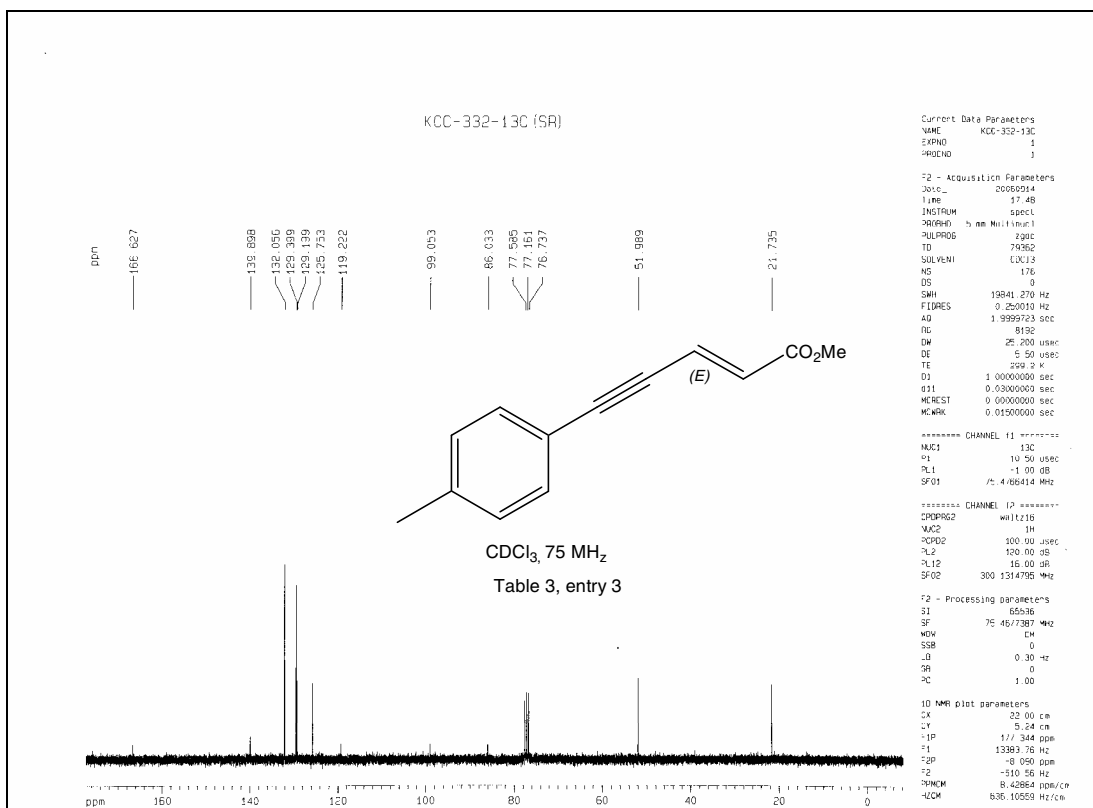

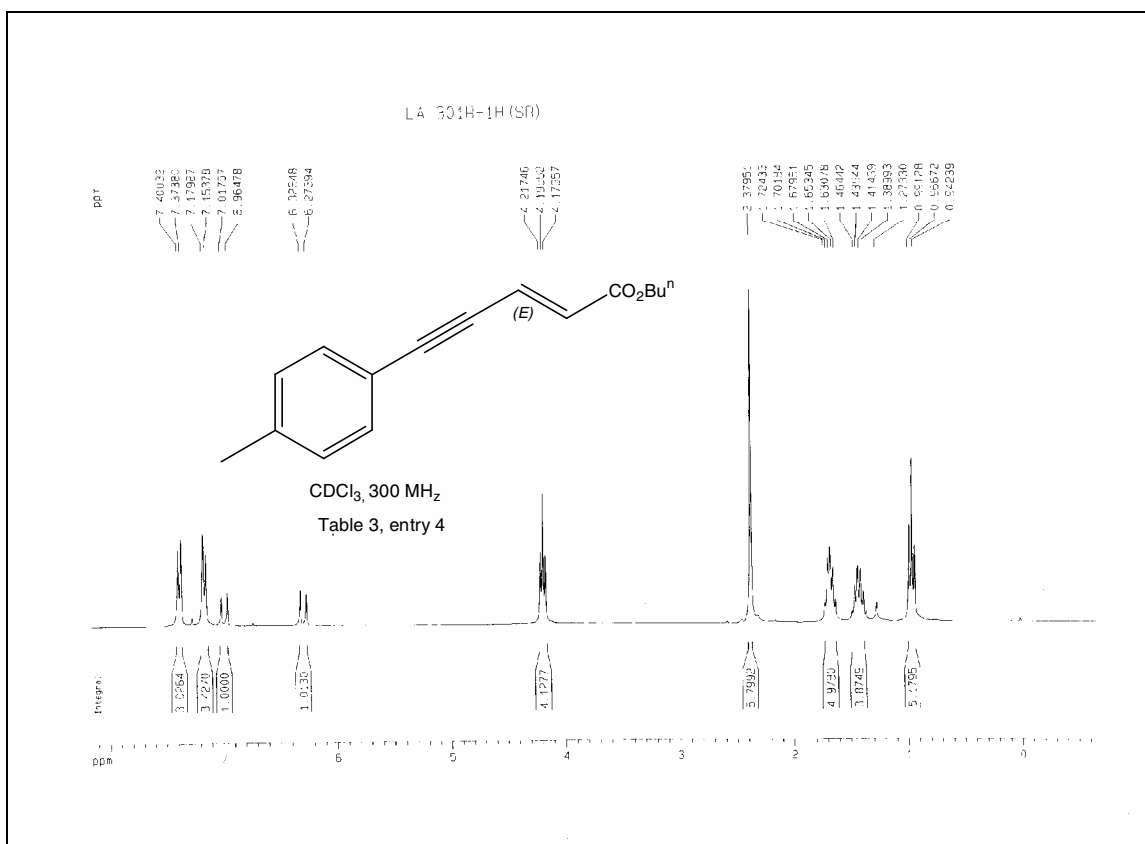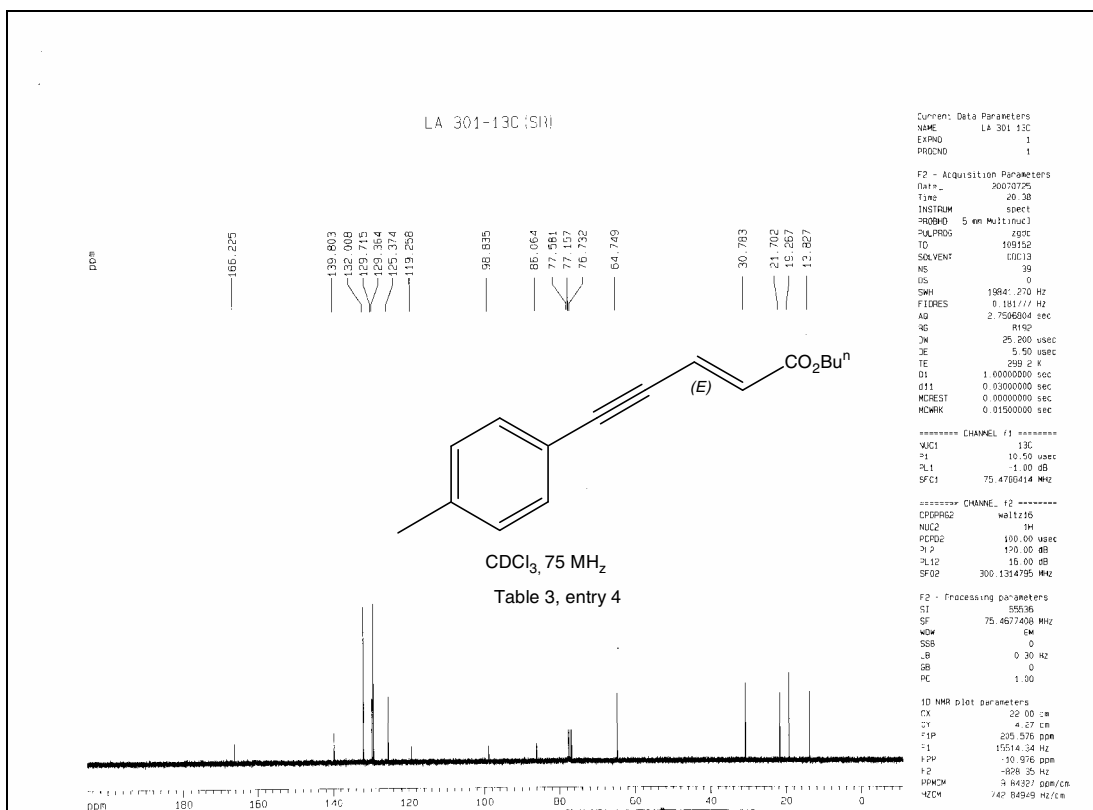

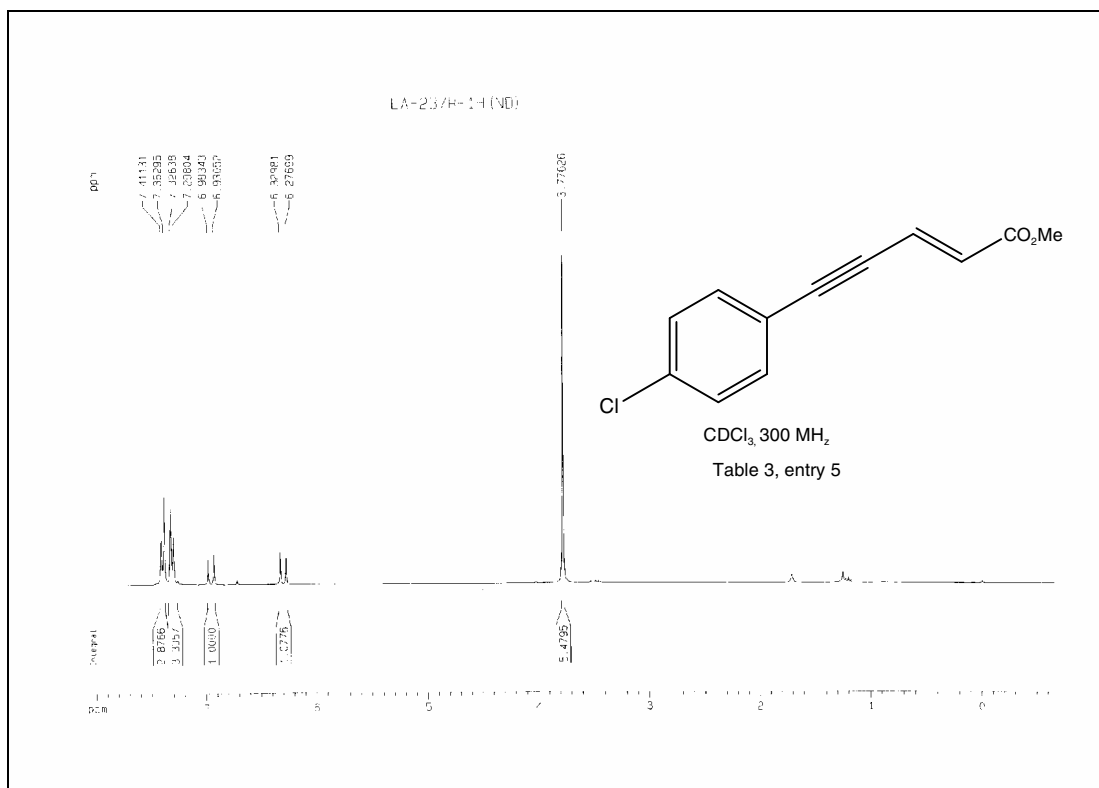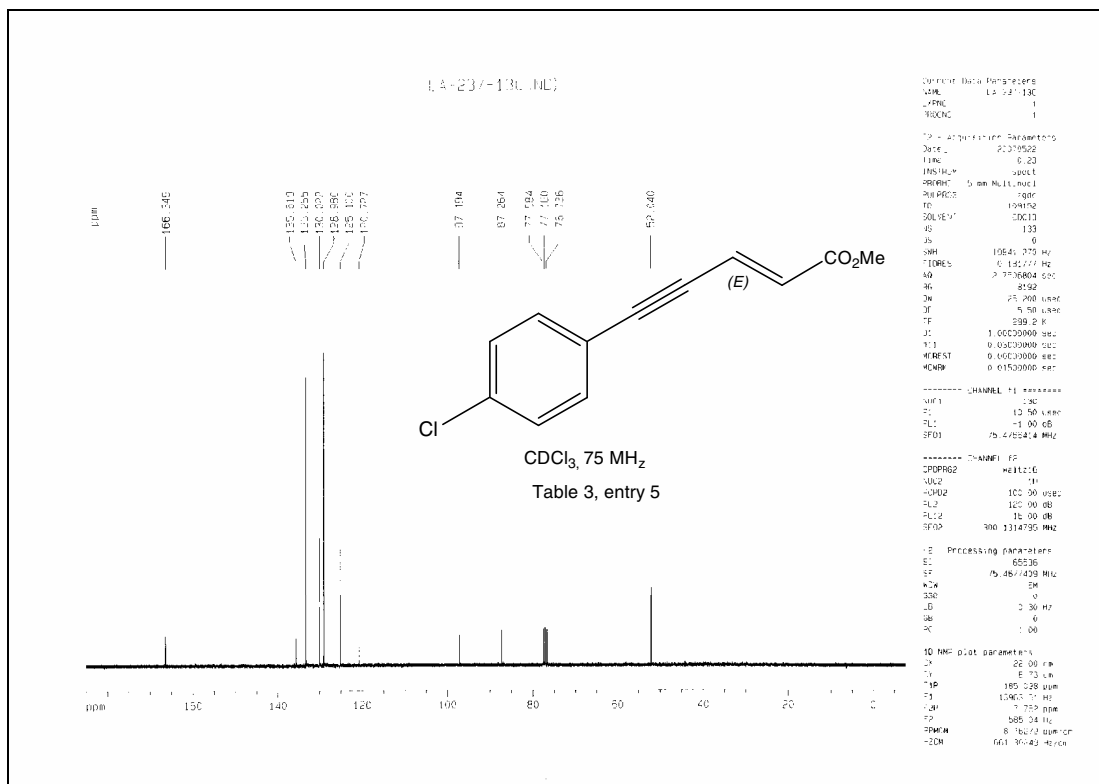

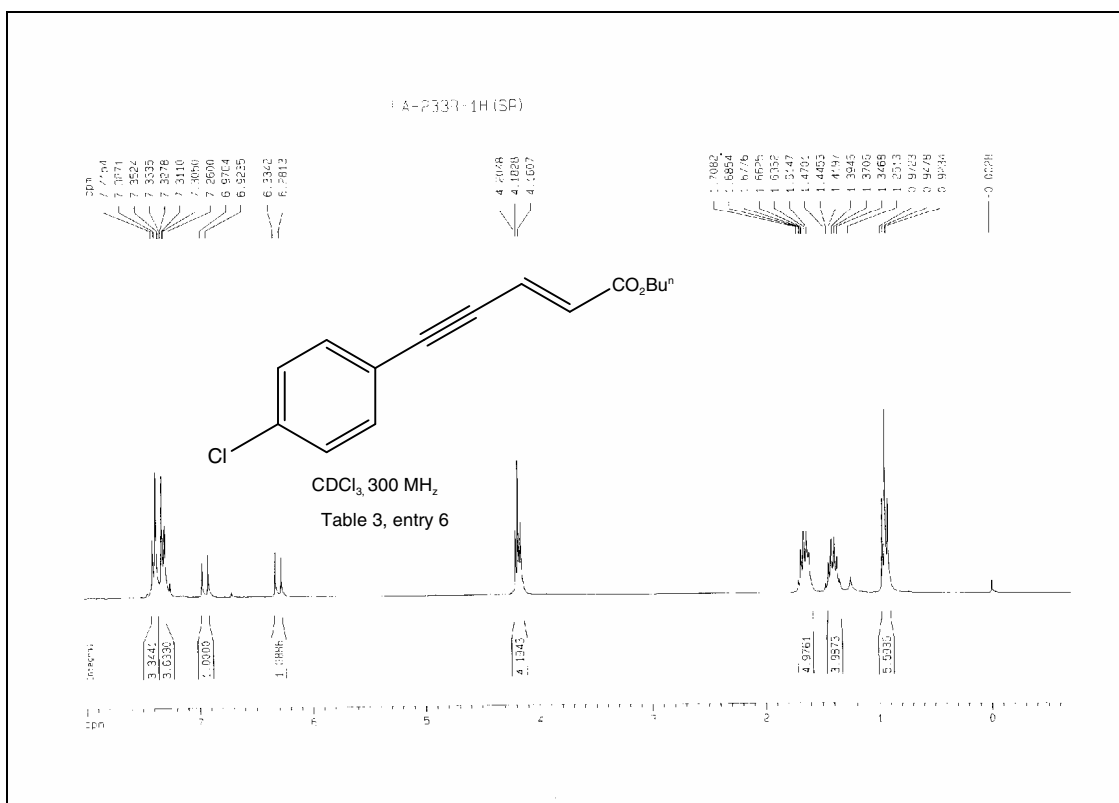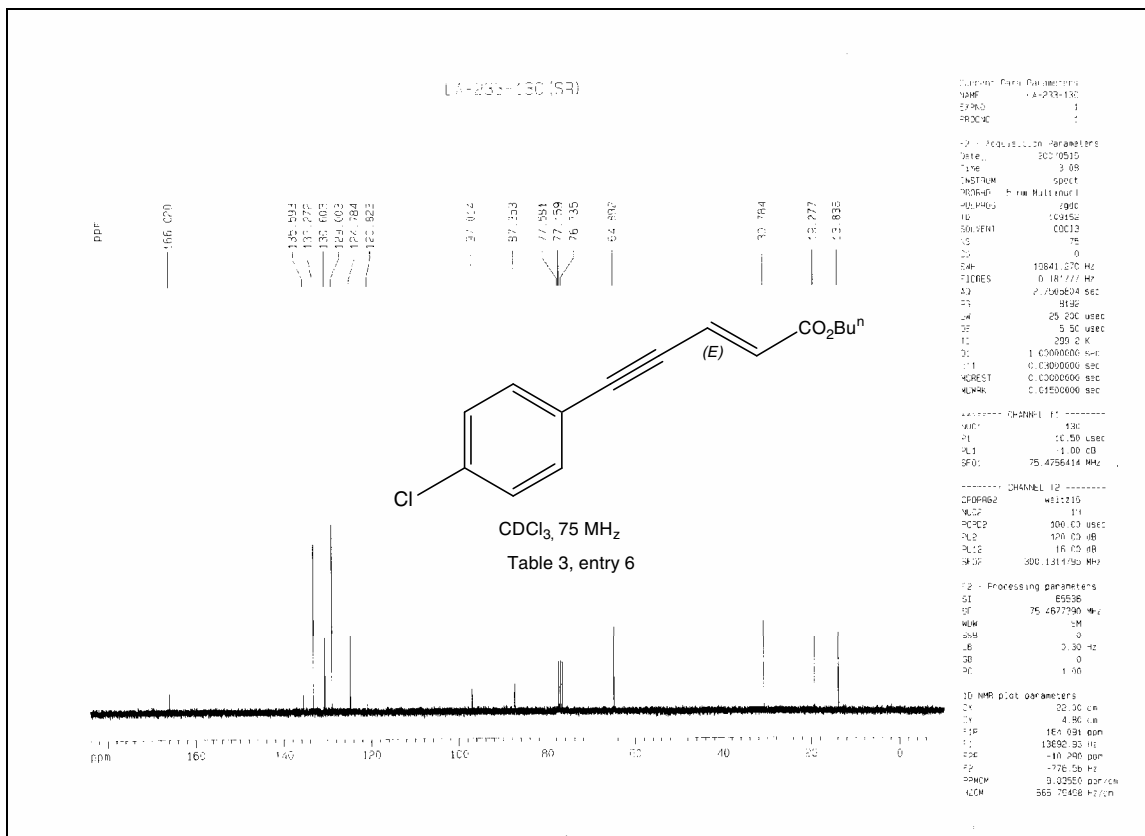

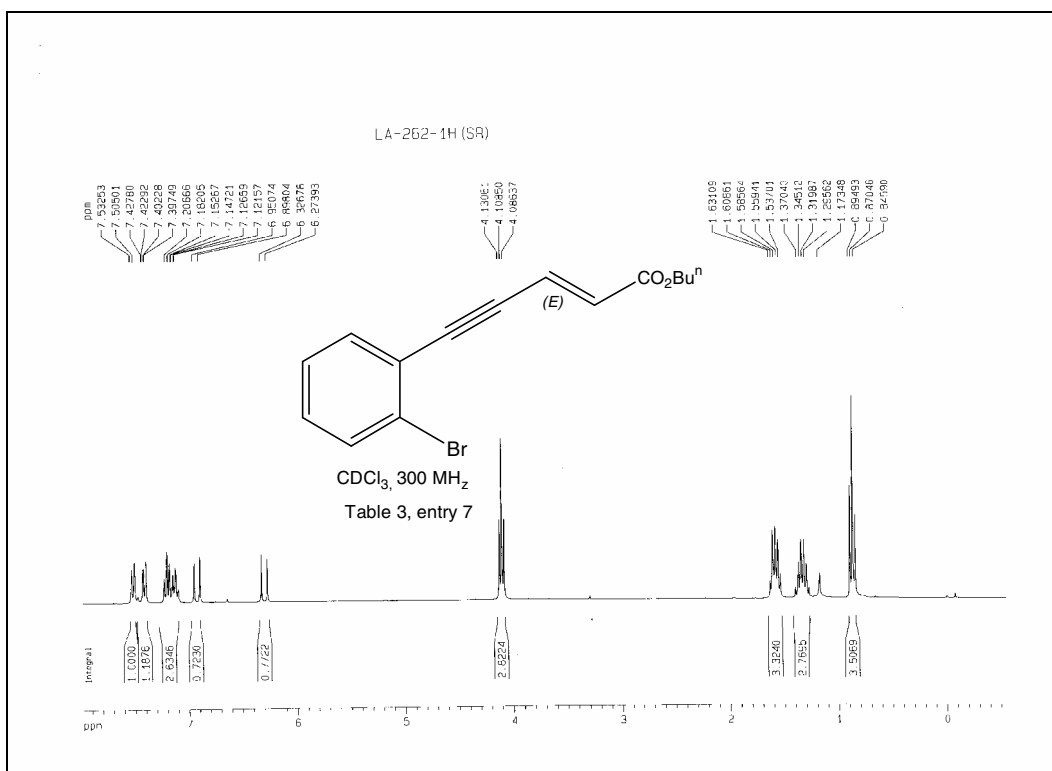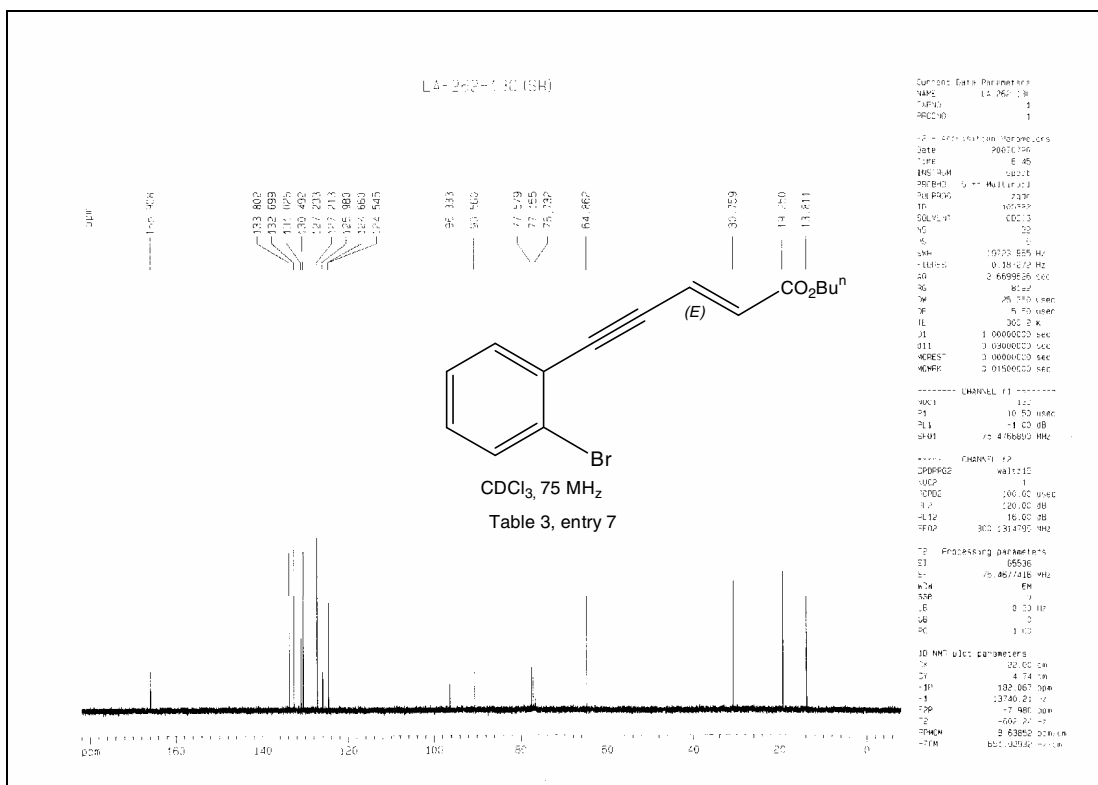

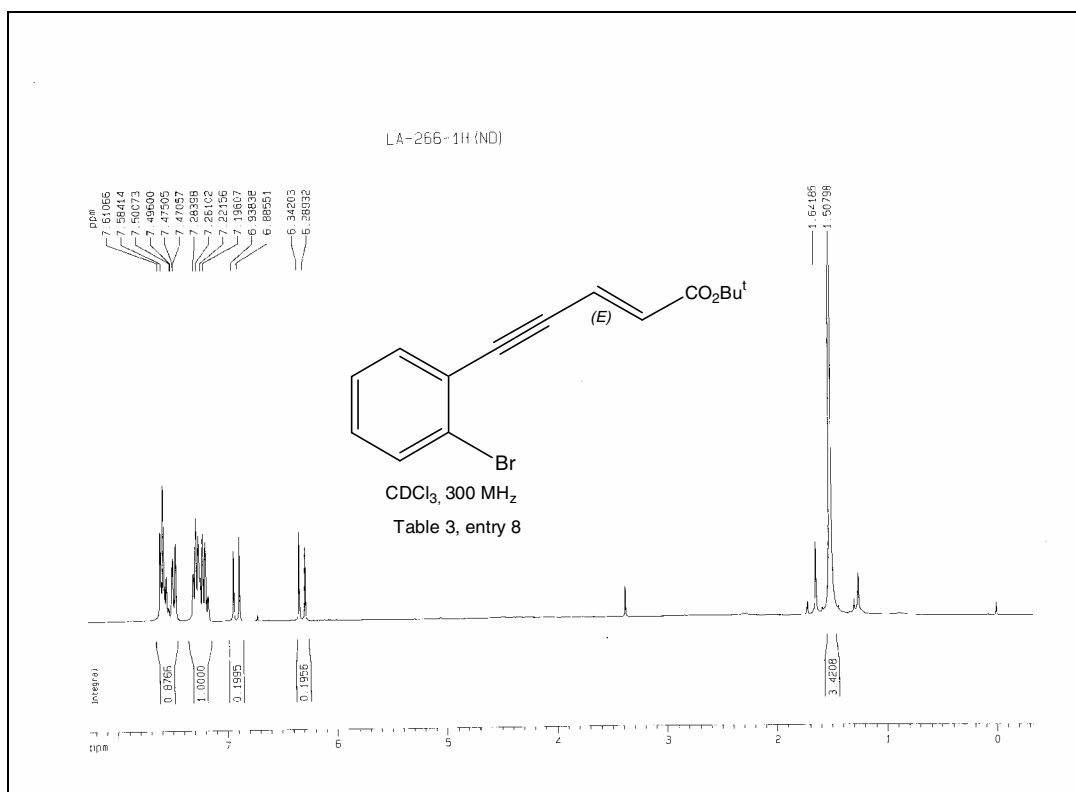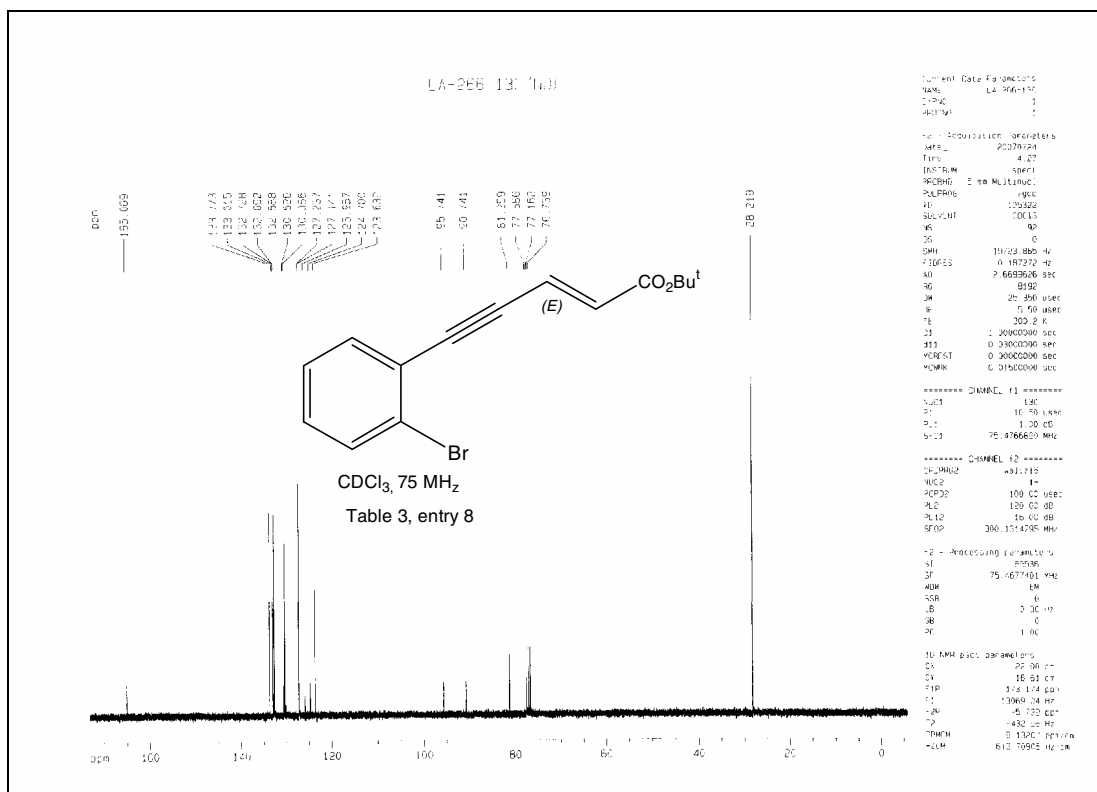

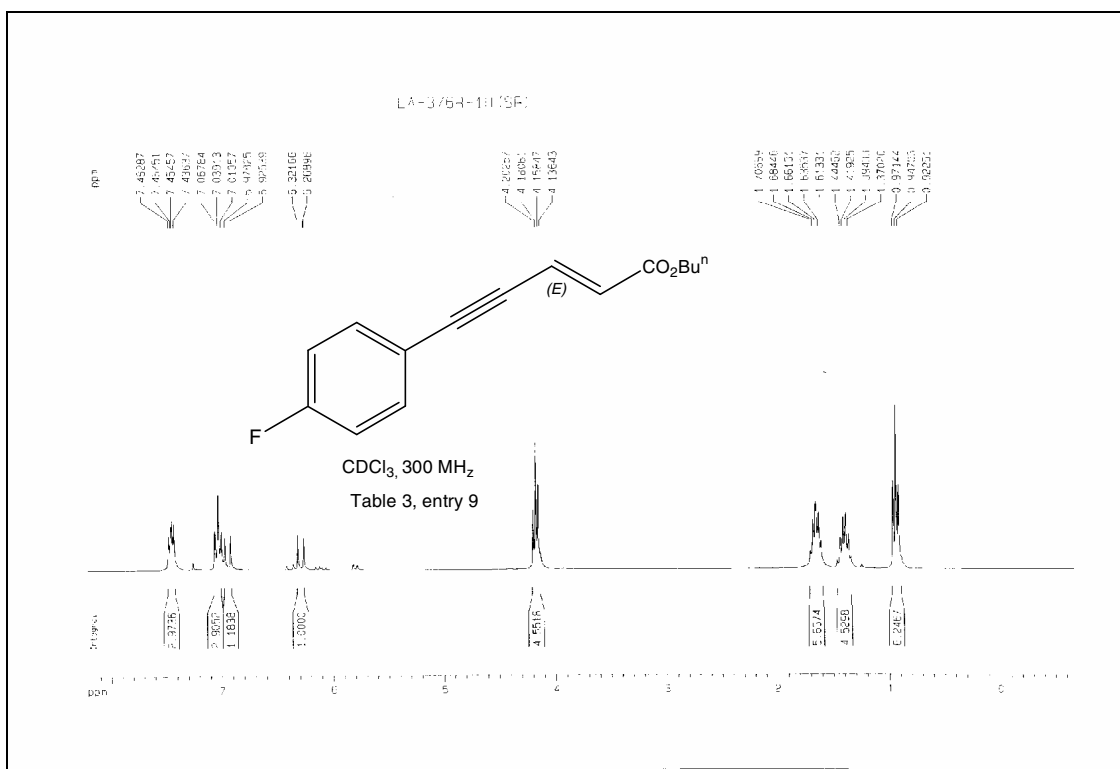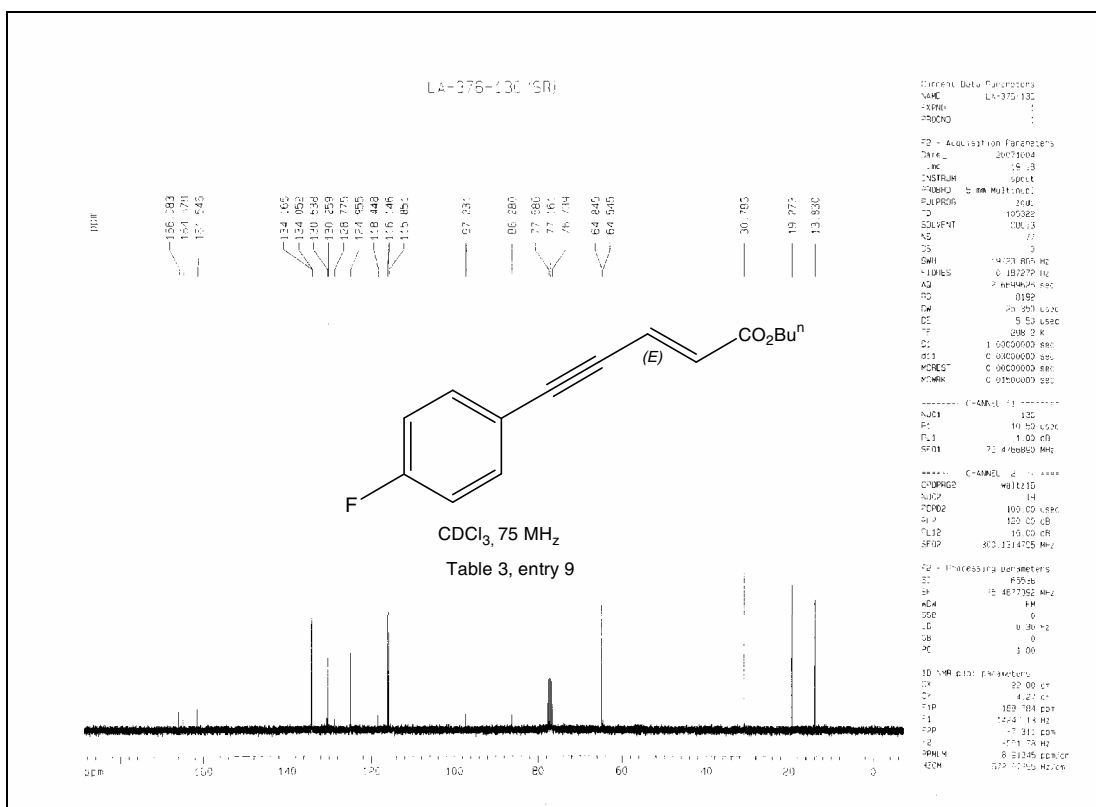

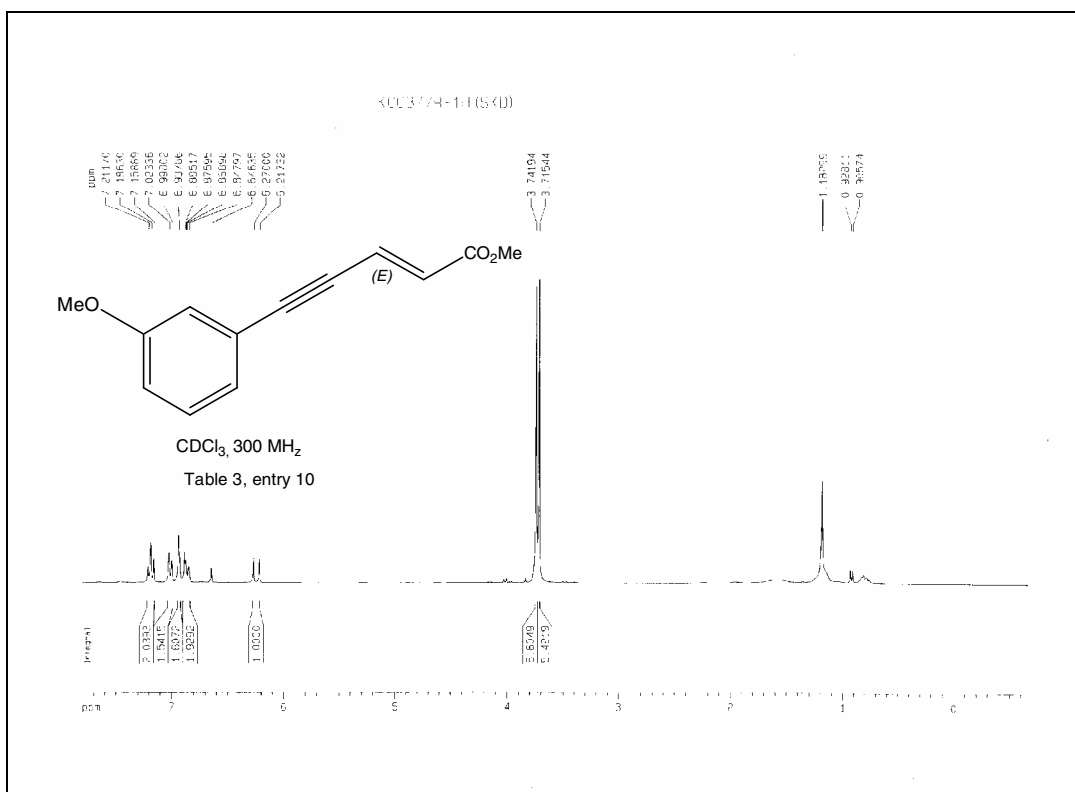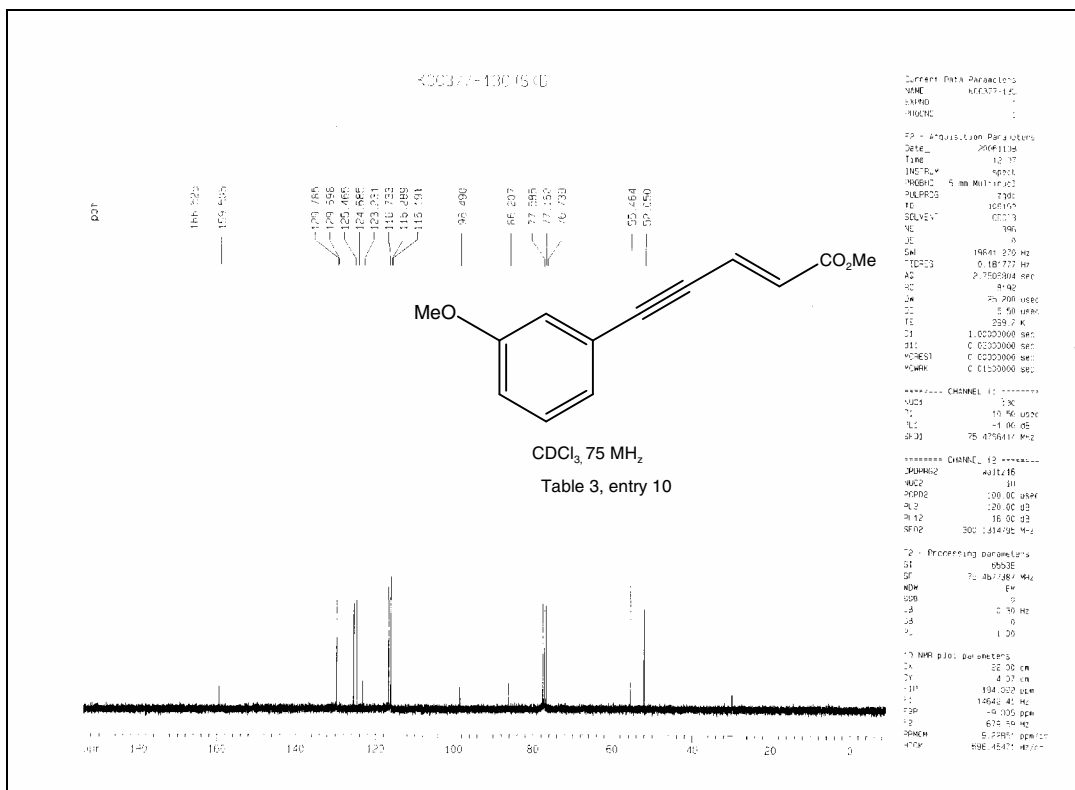



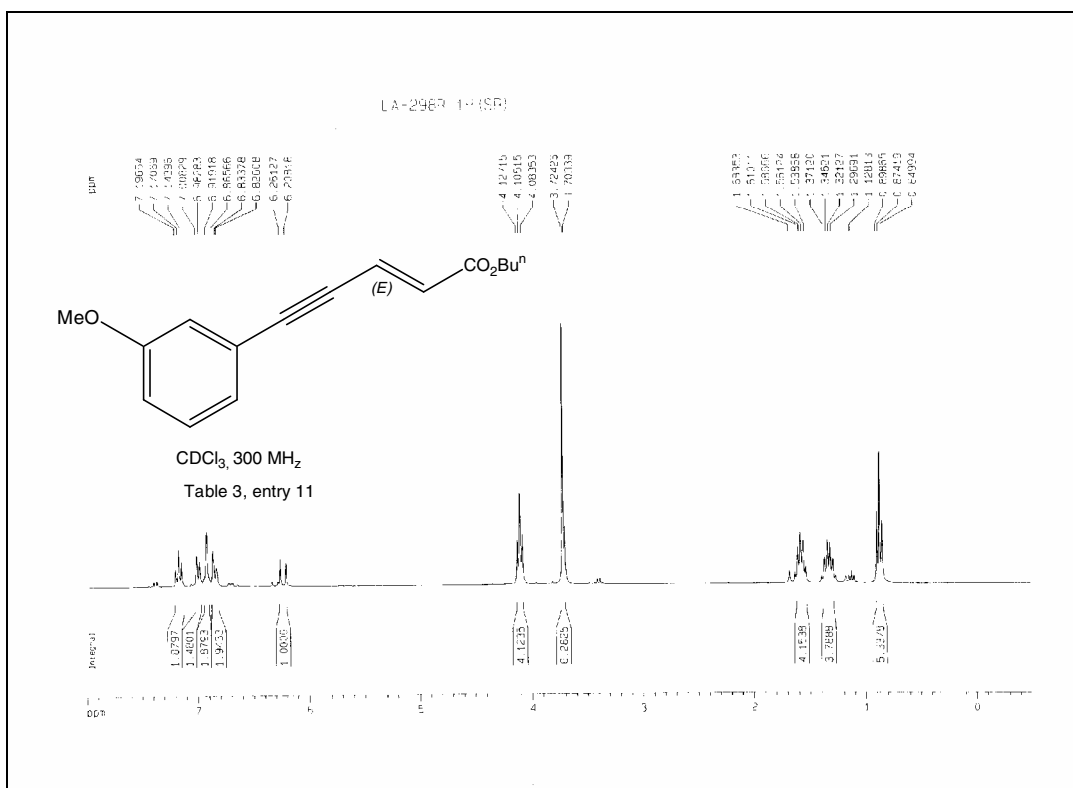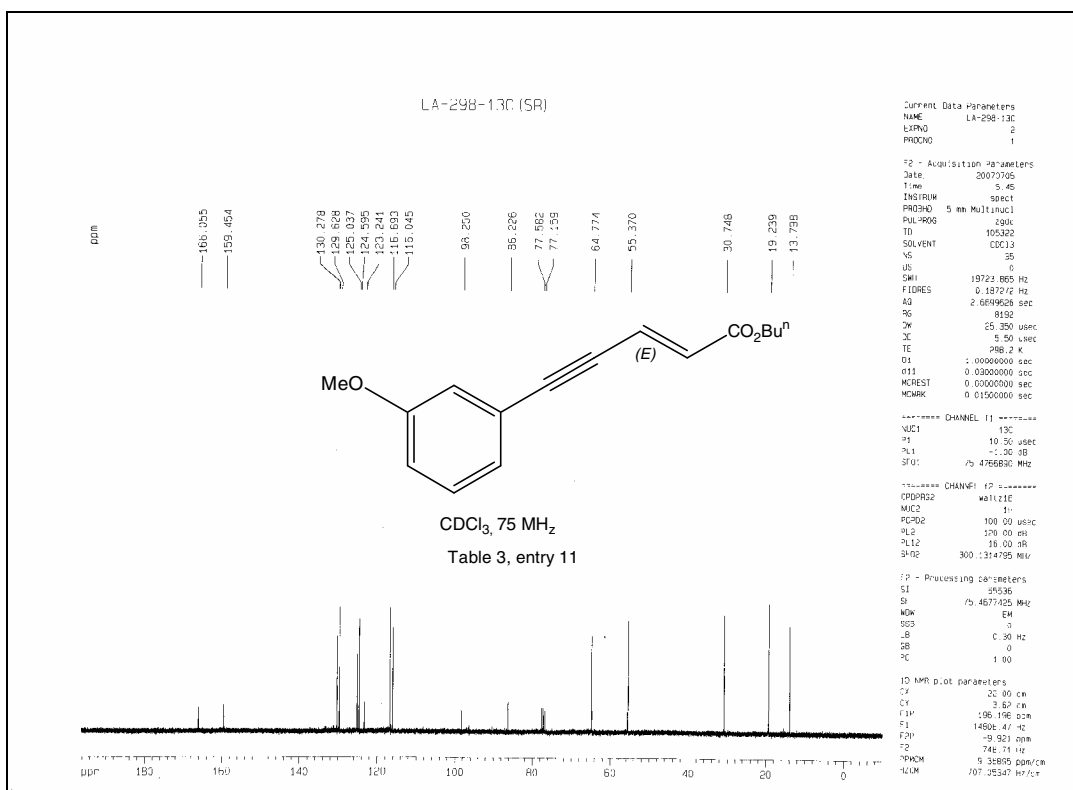

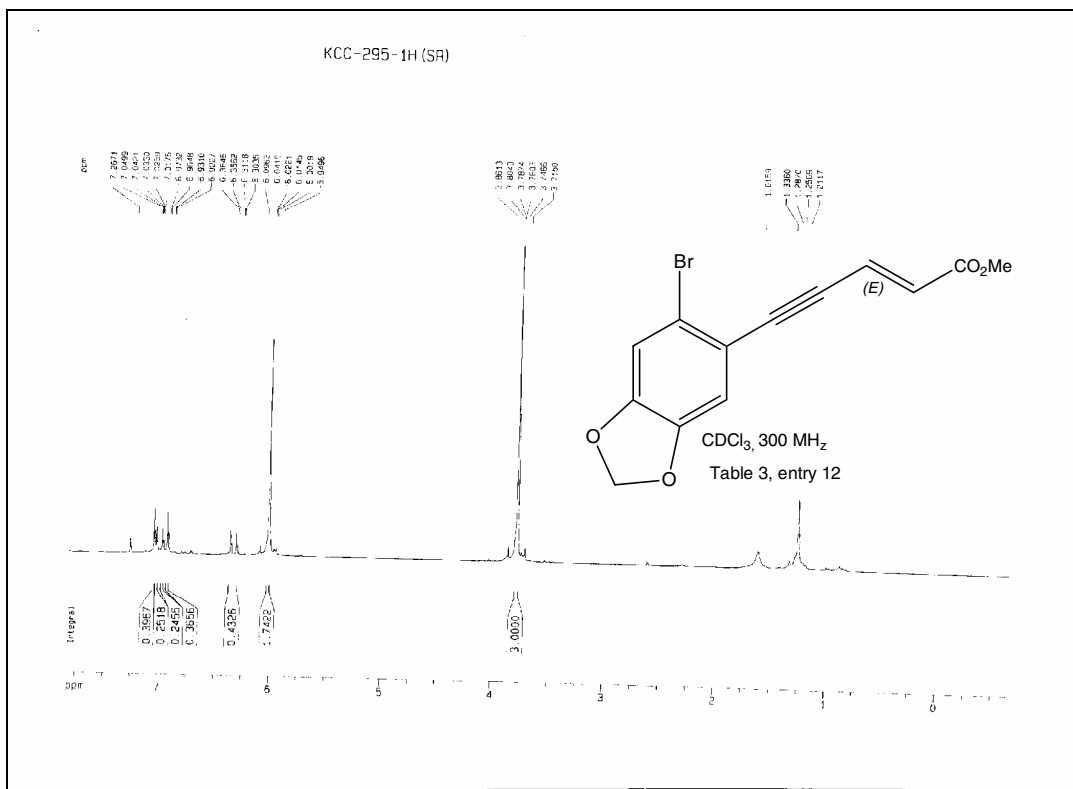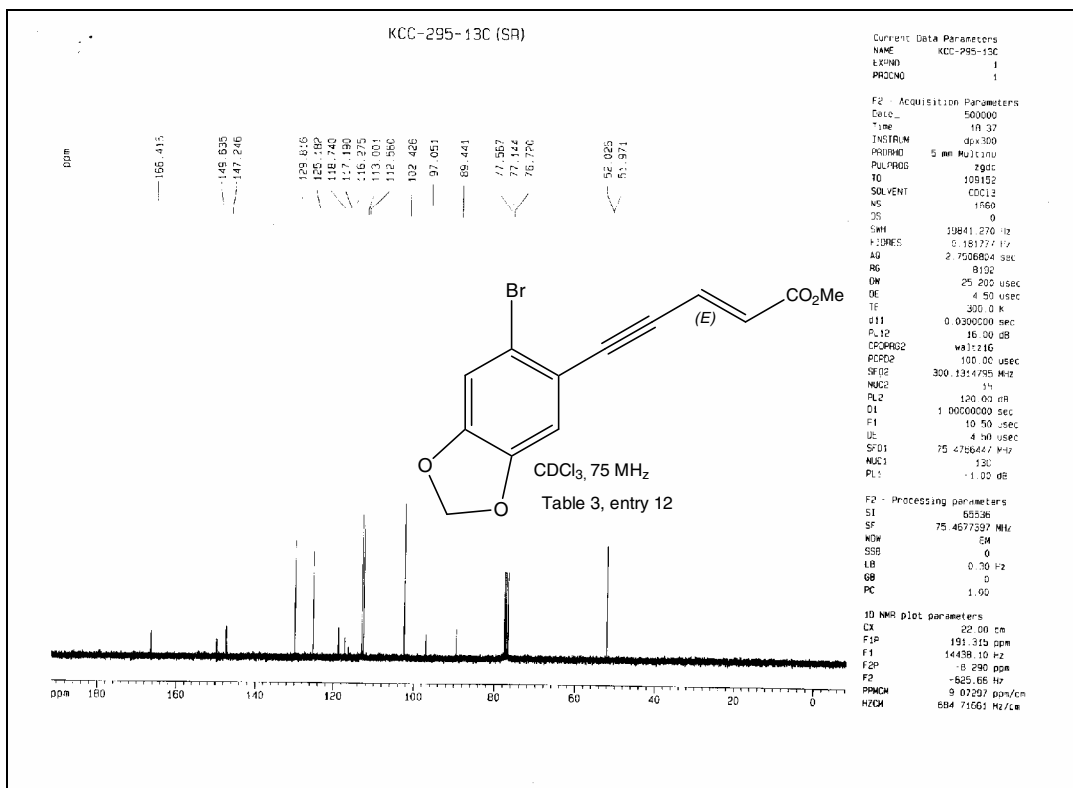

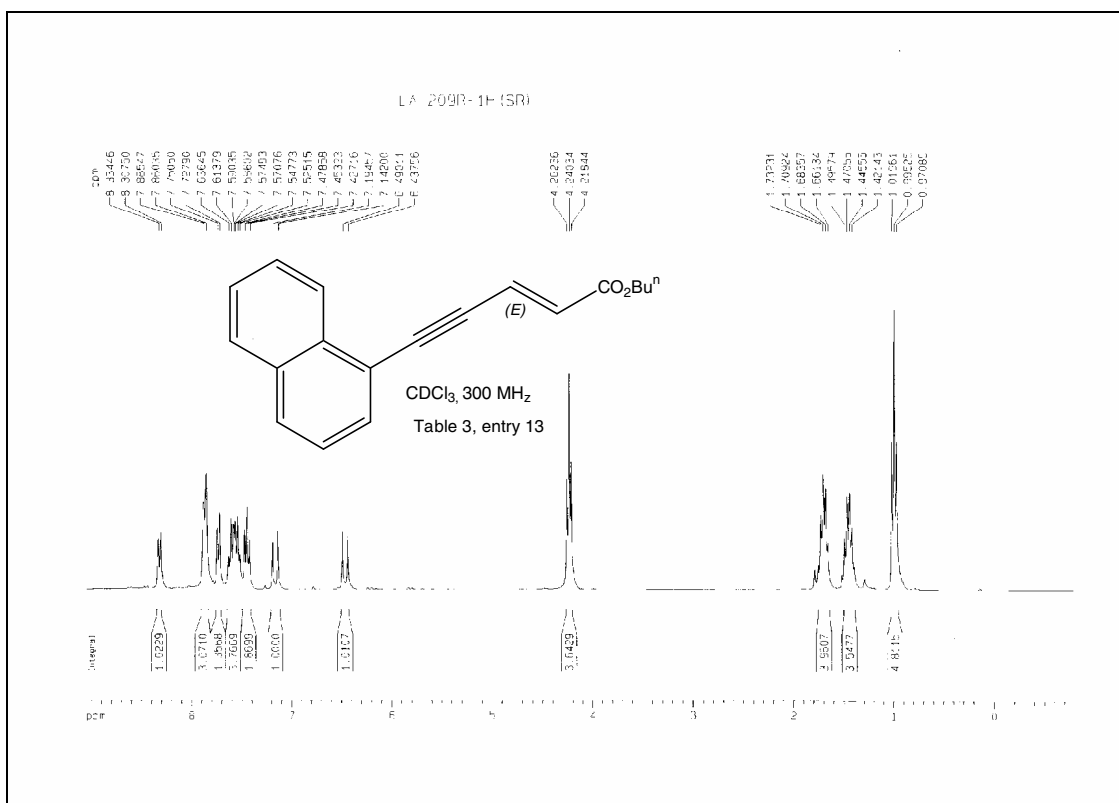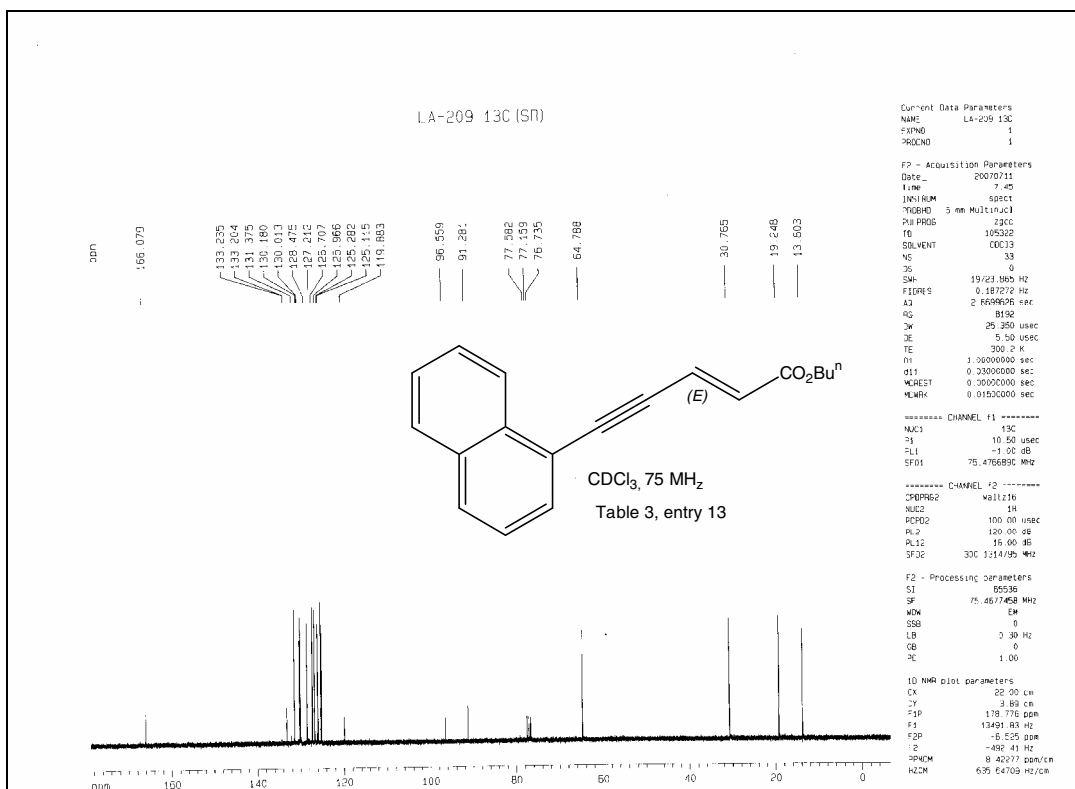

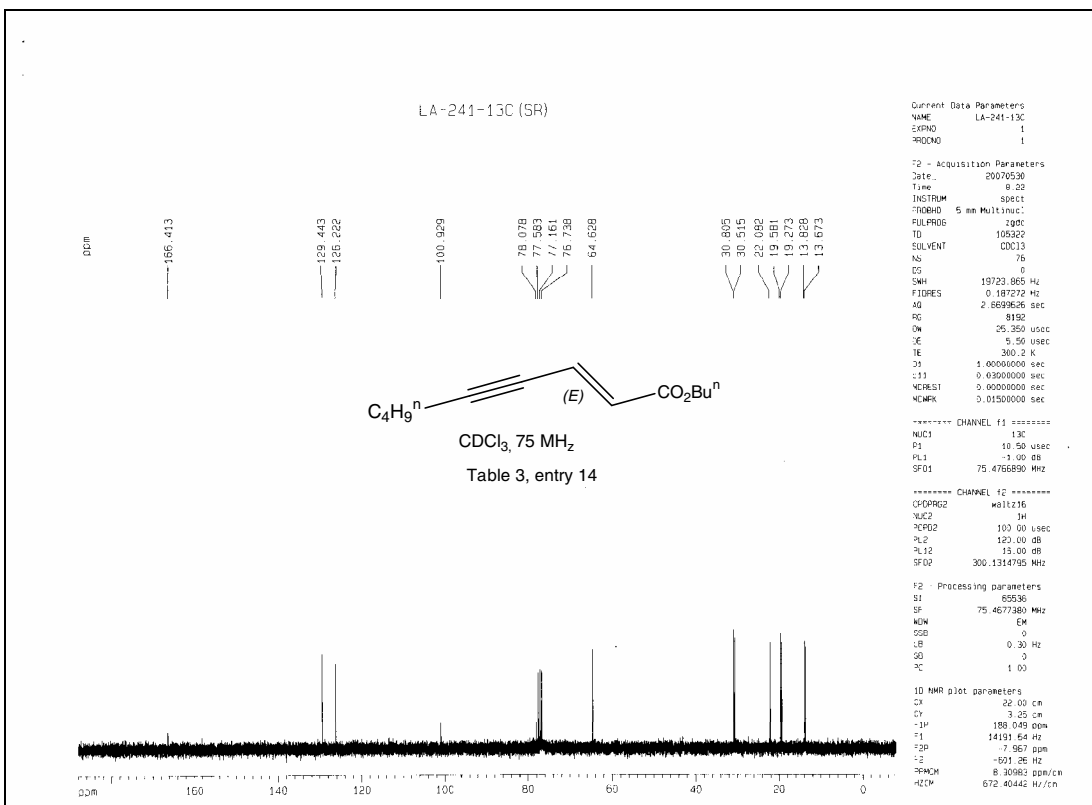

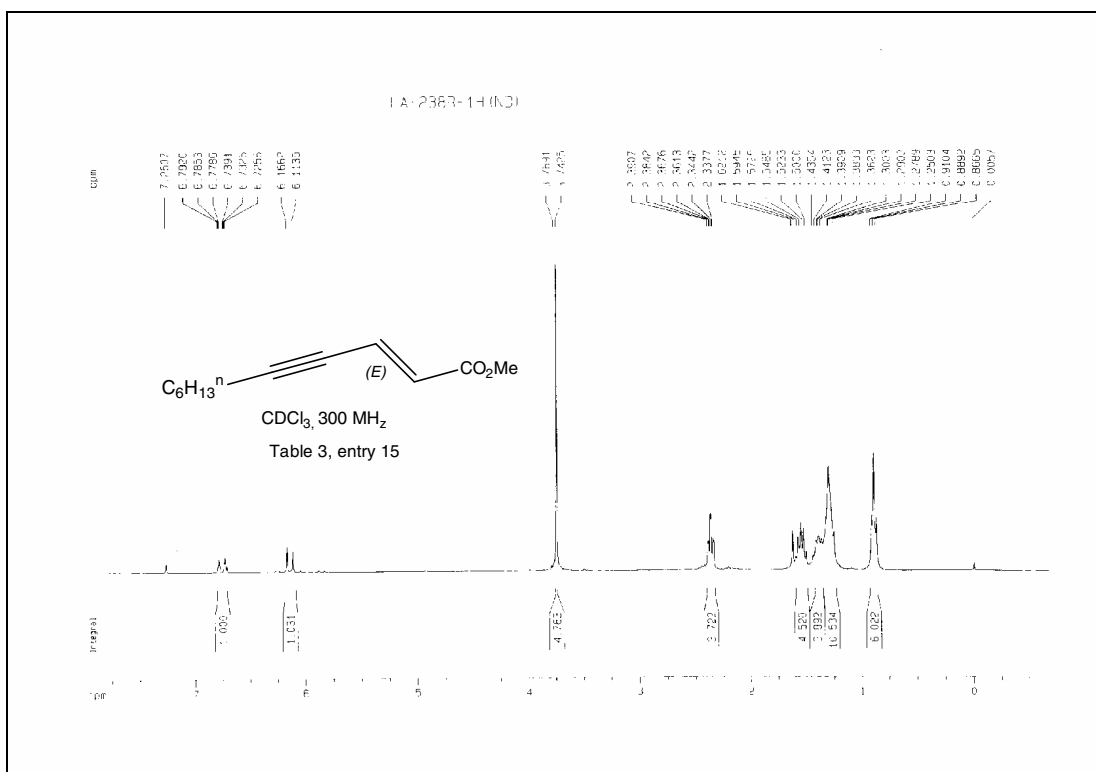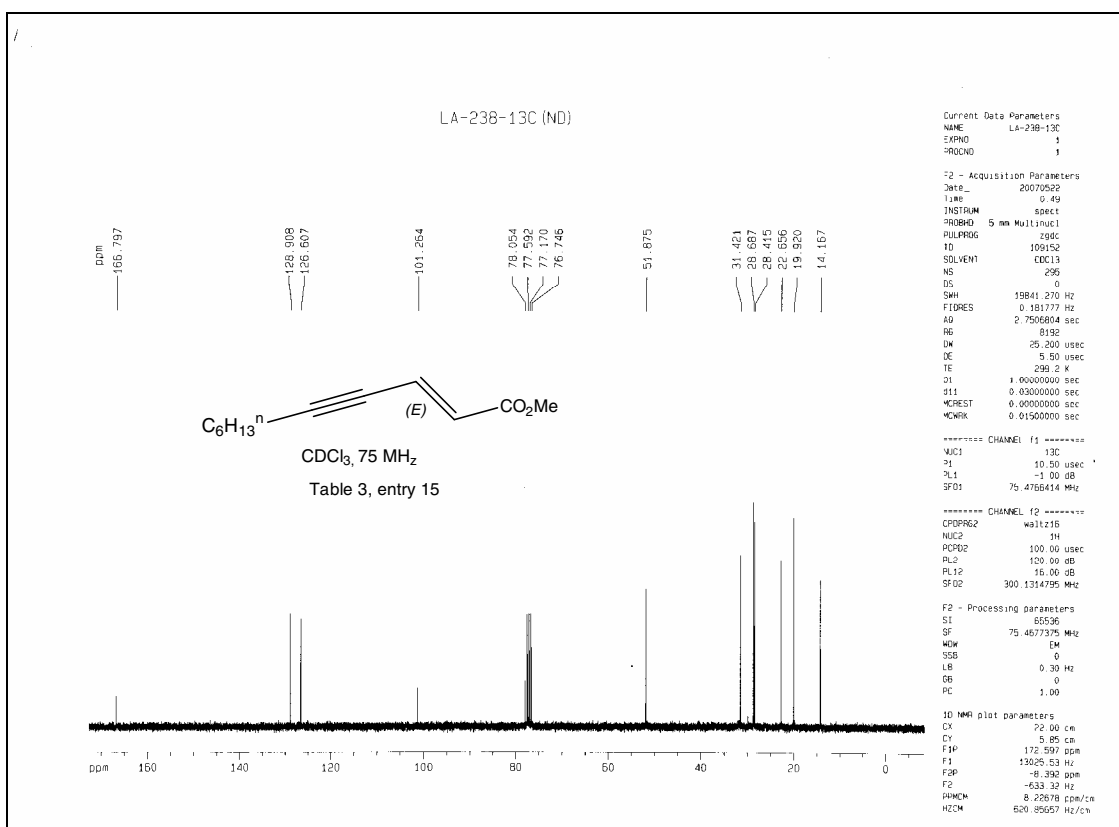

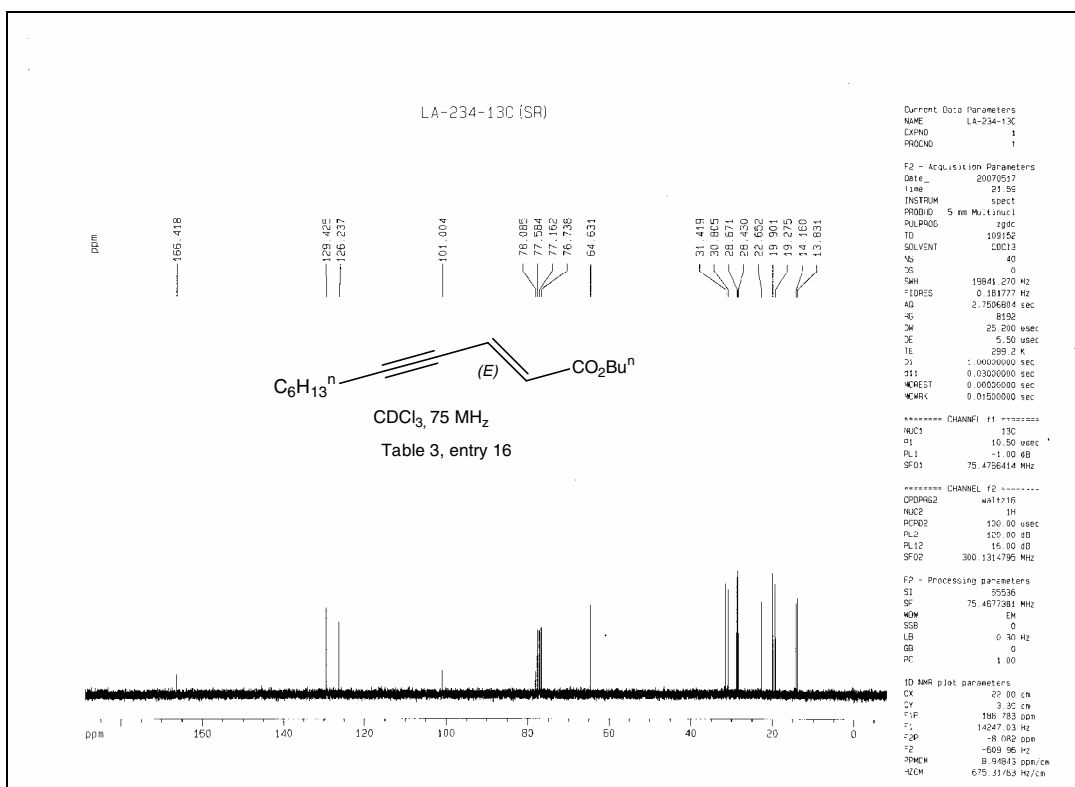

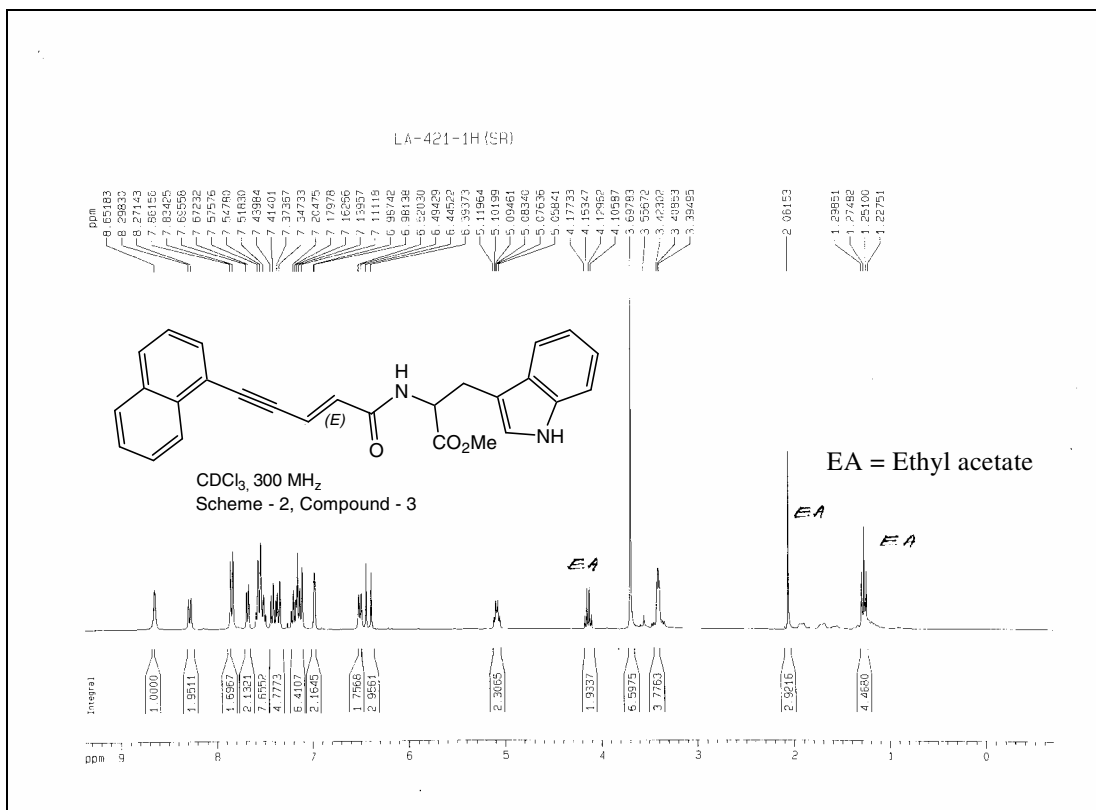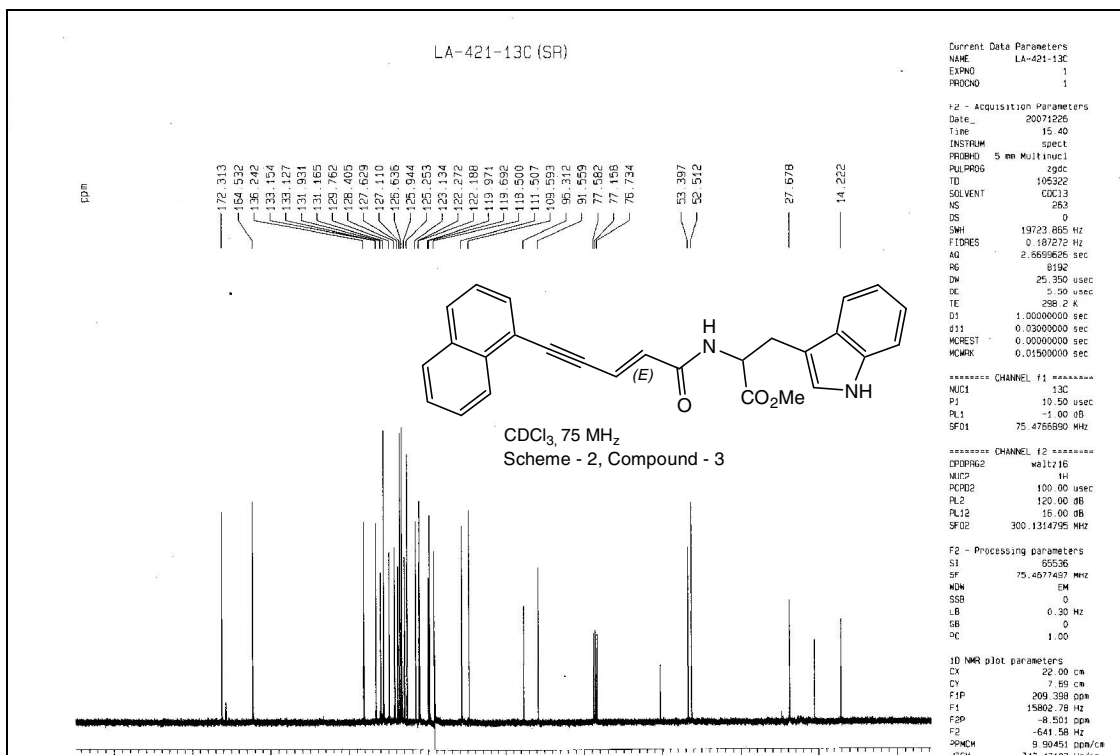

Supplement: Supplementary file 1 [file 4625116]
